# Supplementary material for: Antimicrobial, Antioxidant and Antiproliferative Secondary Metabolites from Inonotus nidus-pici
Source: MDPI journal article supplement (doi:10.3390/molecules26185453), 2021-09-07
Supplement: s1 [file s1]

# Antimicrobial, antioxidant and antiproliferative secondary metabolites from *Inonotus nidus-pici*

Zsófia Garádi<sup>1,2</sup>, Miklós Dékány<sup>3</sup>, Ágnes M. Móricz<sup>4</sup>, Anikó Gaál<sup>5</sup>, Viktor Papp<sup>6</sup>, Szabolcs Béni<sup>1</sup>, and Attila Ványolós<sup>1,\*</sup>

<sup>1</sup> Department of Pharmacognosy, Semmelweis University, Üllői u. 26, H-1085 Budapest, Hungary; garadi.zsofia@pharma.semmelweis-univ.hu, beni.szabolcs@pharma.semmelweis-univ.hu,

<sup>2</sup> Directorate of Drug Substance Development, Egis Pharmaceuticals Plc, P. O. Box 100, H-1475 Budapest, Hungary;

<sup>3</sup> Spectroscopic Research, Gedeon Richter Plc., Gyömrői út 19-21, H-1103 Budapest, Hungary; m.dekany@richter.hu

<sup>4</sup> Plant Protection Institute, Centre for Agricultural Research, ELKH, 1022 Budapest, Herman Ottó út 15, Hungary; moricz.agnes@atk.hu

<sup>5</sup> Biological Nanochemistry Research Group, Institute of Materials and Environmental Chemistry, Research Centre for Natural Sciences, Magyar Tudósok Körútja 2, H-1117 Budapest, Hungary, gaal.aniko@ttk.hu

<sup>6</sup> Department of Botany, Hungarian University of Agriculture and Life Sciences, H-1118 Budapest, Villányi út 29-43, Hungary; papp.viktor@uni-mate.hu

\*Correspondence: vanyolosa@pharmacognosy.hu

## Table of contents

|                                                                                                                                               |    |
|-----------------------------------------------------------------------------------------------------------------------------------------------|----|
| NMR and MS spectra and spectral data of compound <b>1</b> .....                                                                               | 3  |
| Figure S1. <sup>1</sup> H NMR spectrum of compound <b>1</b> (THF- <i>d</i> <sub>8</sub> ).....                                                | 3  |
| Figure S2. <sup>13</sup> C spectrum of compound <b>1</b> (THF- <i>d</i> <sub>8</sub> ).....                                                   | 3  |
| Figure S3. COSY spectrum of compound <b>1</b> (THF- <i>d</i> <sub>8</sub> ).....                                                              | 4  |
| Figure S4. HSQC spectrum of compound <b>1</b> (THF- <i>d</i> <sub>8</sub> ).....                                                              | 4  |
| Figure S5. HMBC spectrum of compound <b>1</b> (THF- <i>d</i> <sub>8</sub> ).....                                                              | 5  |
| Figure S7. <sup>1</sup> H NMR spectrum of compound <b>1</b> (pyridine- <i>d</i> <sub>5</sub> ).....                                           | 6  |
| Figure S8. <sup>13</sup> C NMR spectrum of compound <b>1</b> (pyridine- <i>d</i> <sub>5</sub> ).....                                          | 6  |
| Figure S9. HRMS spectrum of compound <b>1</b> .....                                                                                           | 7  |
| Figure S10. Full HRMS spectrum of compound <b>1</b> .....                                                                                     | 7  |
| Figure S11. HR-MS/MS spectrum of compound <b>1</b> .....                                                                                      | 8  |
| Table S1. HRMS spectral data of compound <b>1</b> .....                                                                                       | 8  |
| Figure S12. Mass fragmentation of compound <b>1</b> .....                                                                                     | 8  |
| NMR spectra and spectral data of compound <b>2</b> .....                                                                                      | 9  |
| Table S2. Complete <sup>1</sup> H and <sup>13</sup> C NMR resonance assignments for compound <b>2</b> (methanol- <i>d</i> <sub>4</sub> )..... | 9  |
| Figure S13. <sup>1</sup> H NMR spectrum of compound <b>2</b> (methanol- <i>d</i> <sub>4</sub> ) .....                                         | 10 |
| Figure S14. <sup>13</sup> C NMR spectrum of compound <b>2</b> (methanol- <i>d</i> <sub>4</sub> ) .....                                        | 10 |
| NMR spectra and spectral data of compound <b>3, 4 and 5</b> .....                                                                             | 11 |
| Table S3. Complete <sup>1</sup> H and <sup>13</sup> C NMR resonance assignments for compounds <b>3, 4 and 5</b> (CDCl <sub>3</sub> ) ...      | 12 |
| Figure S15. <sup>1</sup> H NMR spectrum of compound <b>3</b> (CDCl <sub>3</sub> ) .....                                                       | 13 |
| Figure S16. <sup>13</sup> C NMR spectrum of compound <b>3</b> (CDCl <sub>3</sub> ) .....                                                      | 13 |
| Figure S17. <sup>1</sup> H NMR spectrum of compound <b>4</b> (CDCl <sub>3</sub> ) .....                                                       | 14 |
| Figure S18. <sup>13</sup> C NMR spectrum of compound <b>4</b> (CDCl <sub>3</sub> ) .....                                                      | 14 |
| Figure S19. <sup>1</sup> H NMR spectrum of compound <b>5</b> (CDCl <sub>3</sub> ) .....                                                       | 15 |
| Figure S20. <sup>13</sup> C NMR spectrum of compound <b>5</b> (CDCl <sub>3</sub> ) .....                                                      | 15 |

# NMR and MS spectra and spectral data of compound **1**

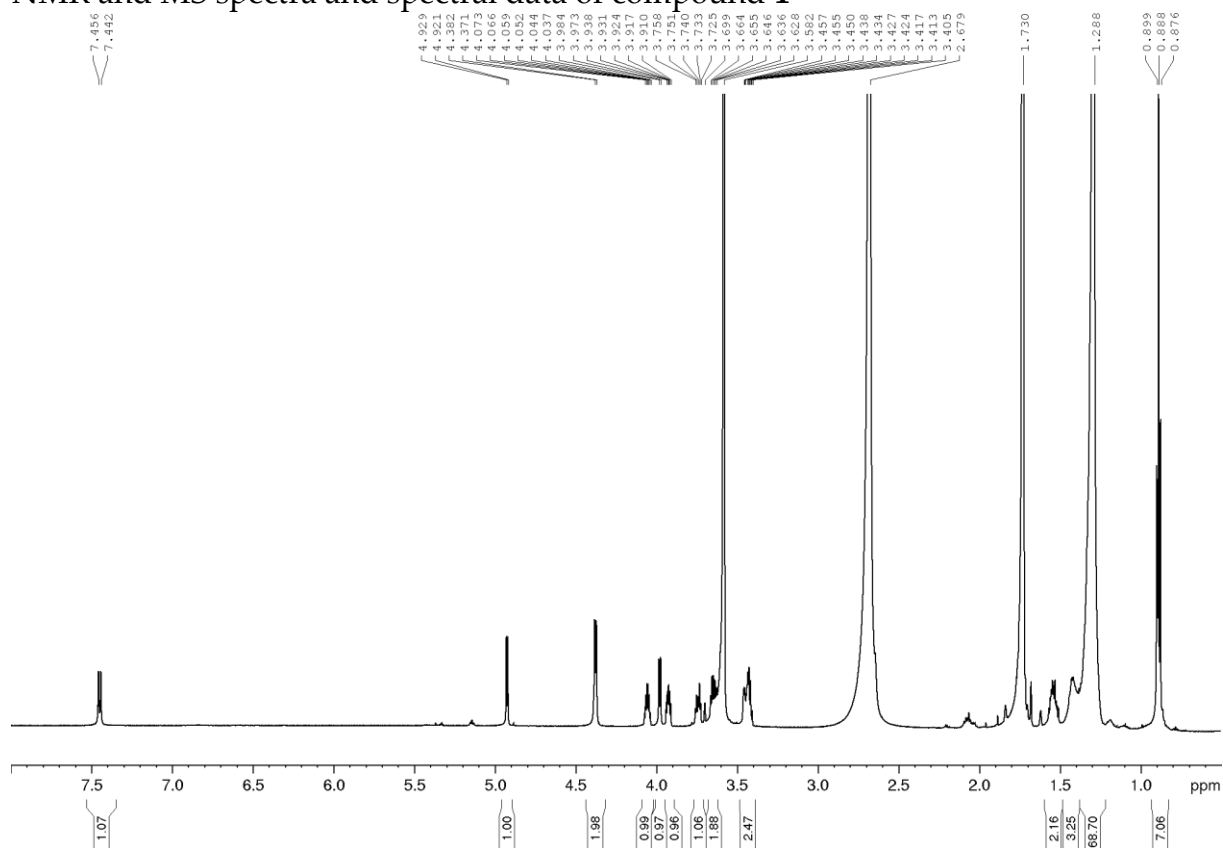

Figure S1. <sup>1</sup>H NMR spectrum of compound **1** (THF-*d*<sub>8</sub>)

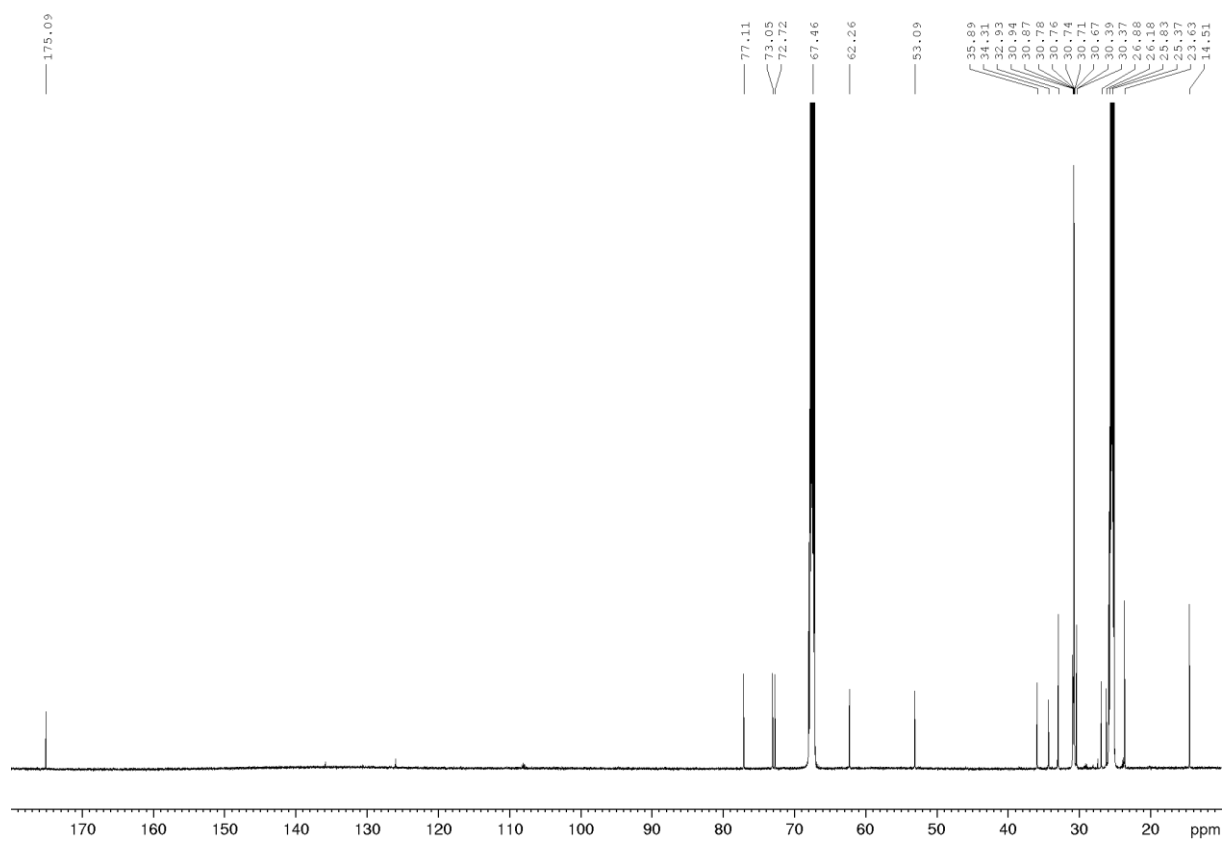

Figure S2. <sup>13</sup>C spectrum of compound **1** (THF-*d*<sub>8</sub>)

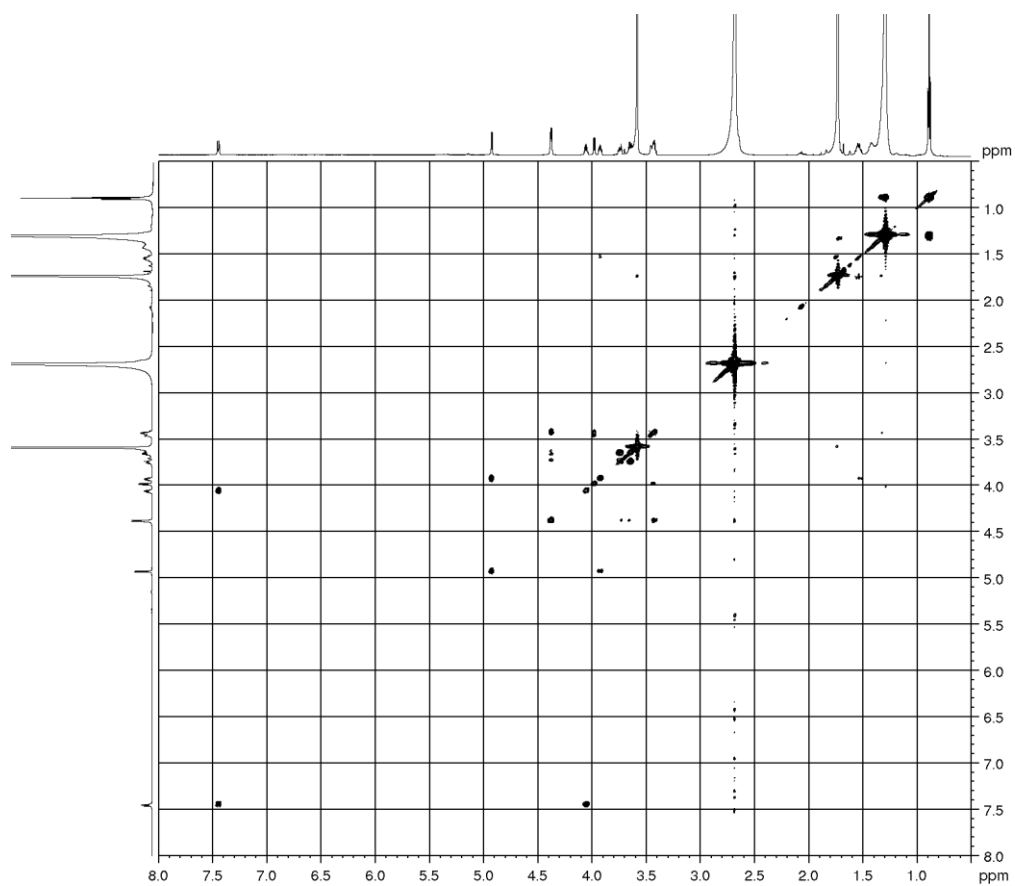

Figure S3. COSY spectrum of compound **1** (THF-*d*<sub>8</sub>)

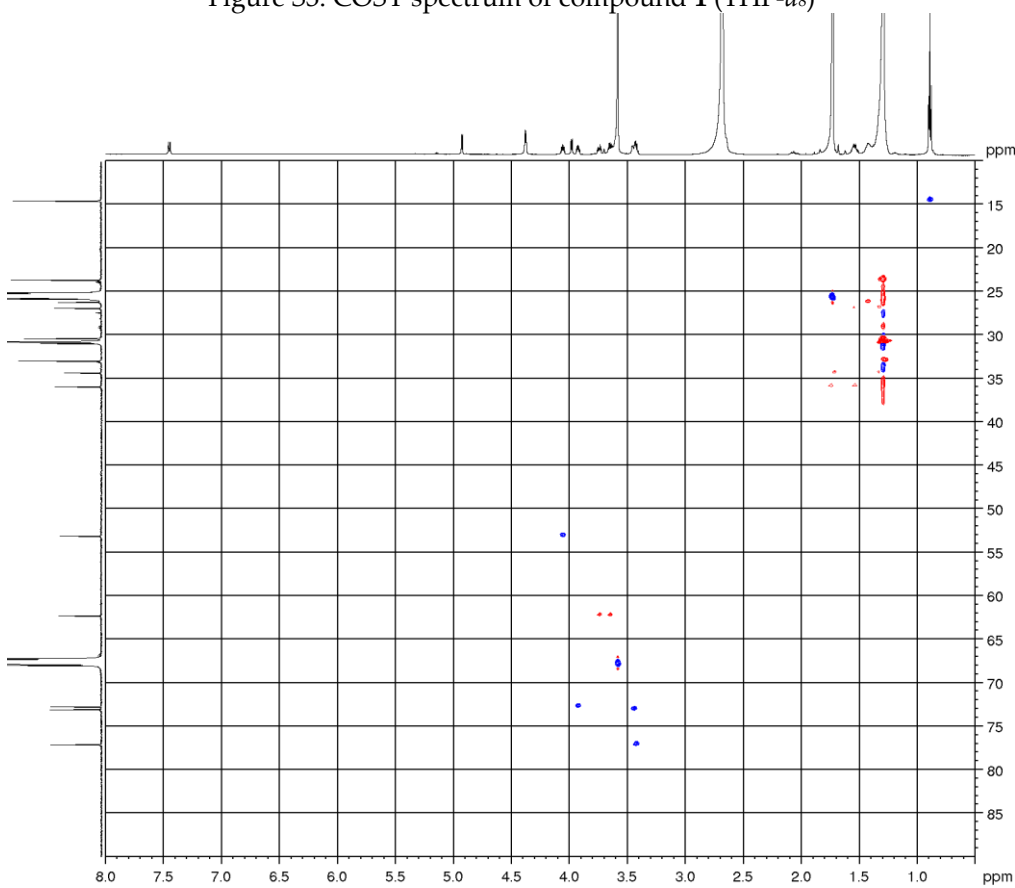

Figure S4. HSQC spectrum of compound **1** (THF-*d*<sub>8</sub>)

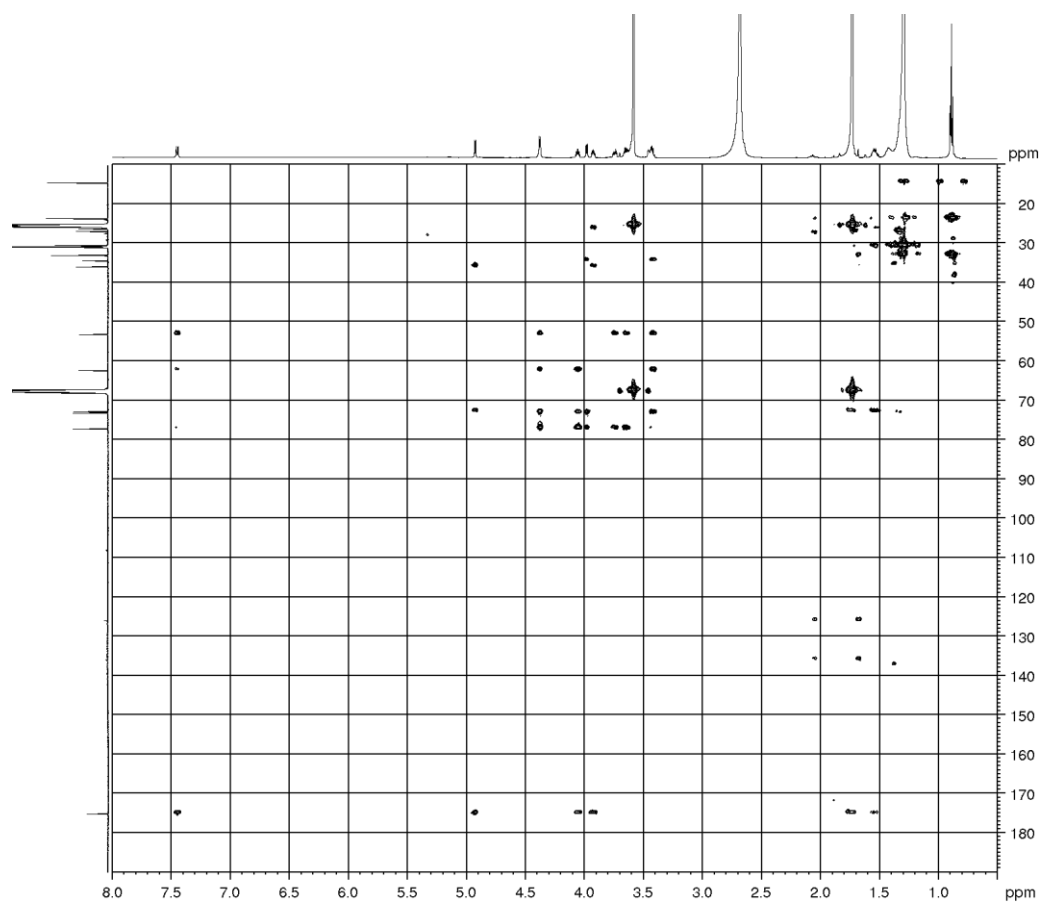

Figure S5. HMBC spectrum of compound **1** (THF-*d*<sub>8</sub>)

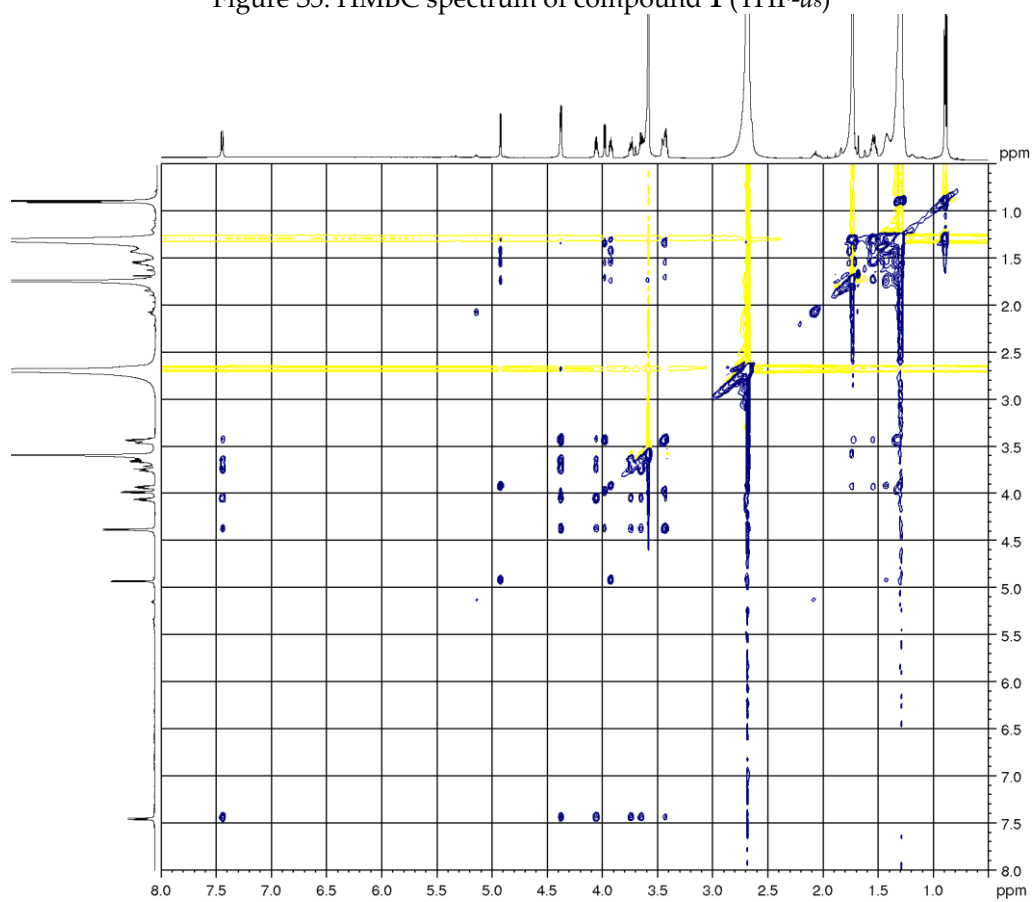

Figure S6. TOCSY spectrum of compound **1** (THF-*d*<sub>8</sub>)

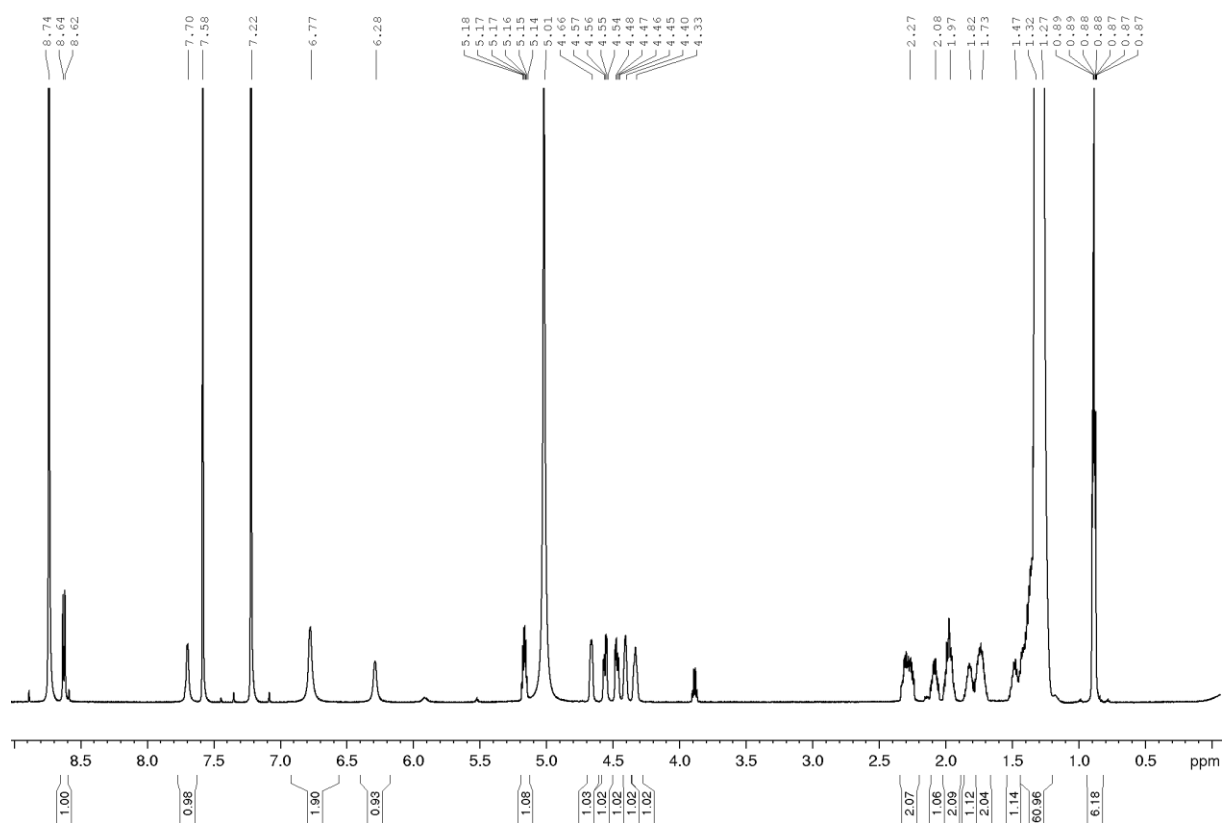

Figure S7. <sup>1</sup>H NMR spectrum of compound 1 (pyridine-*d*<sub>5</sub>)

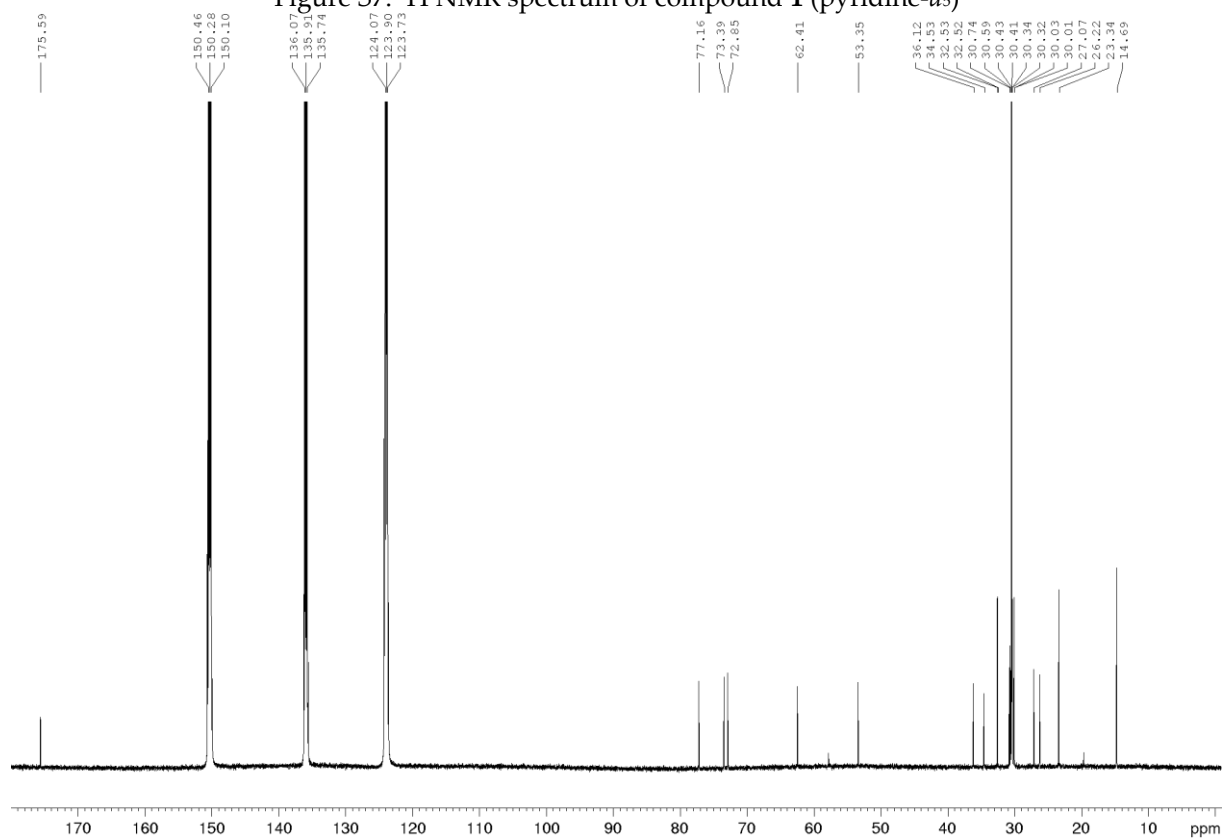

Figure S8. <sup>13</sup>C NMR spectrum of compound 1 (pyridine-*d*<sub>5</sub>)

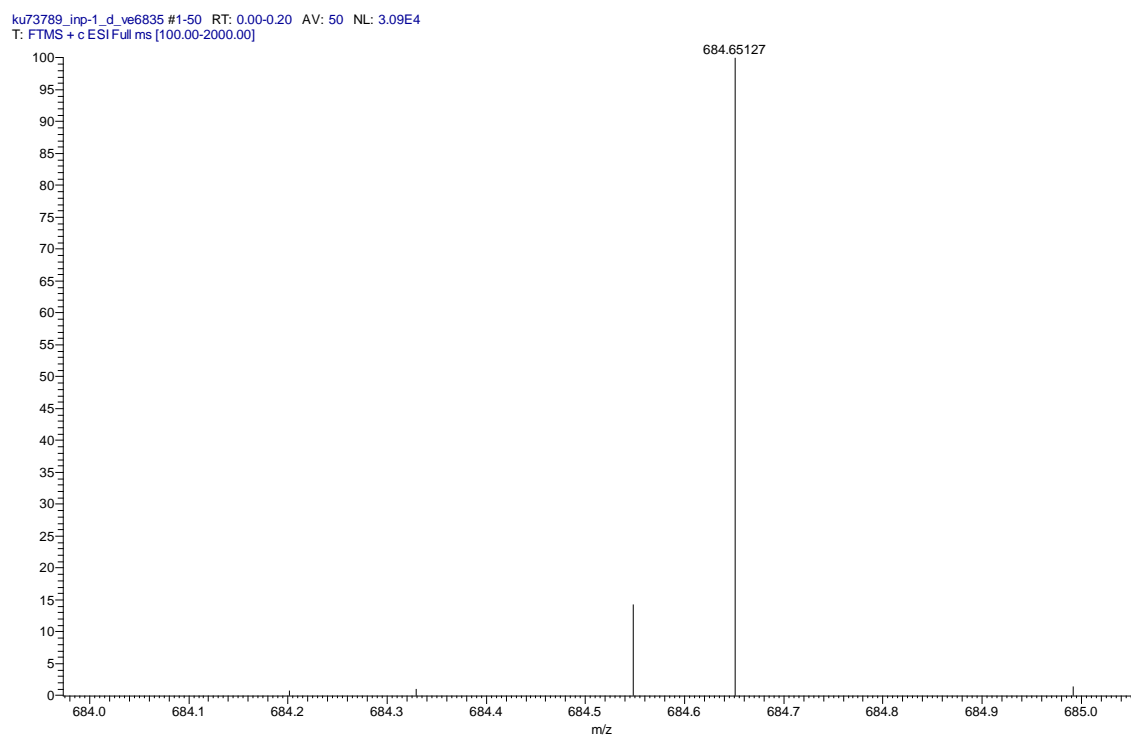

Figure S9. HRMS spectrum of compound **1**

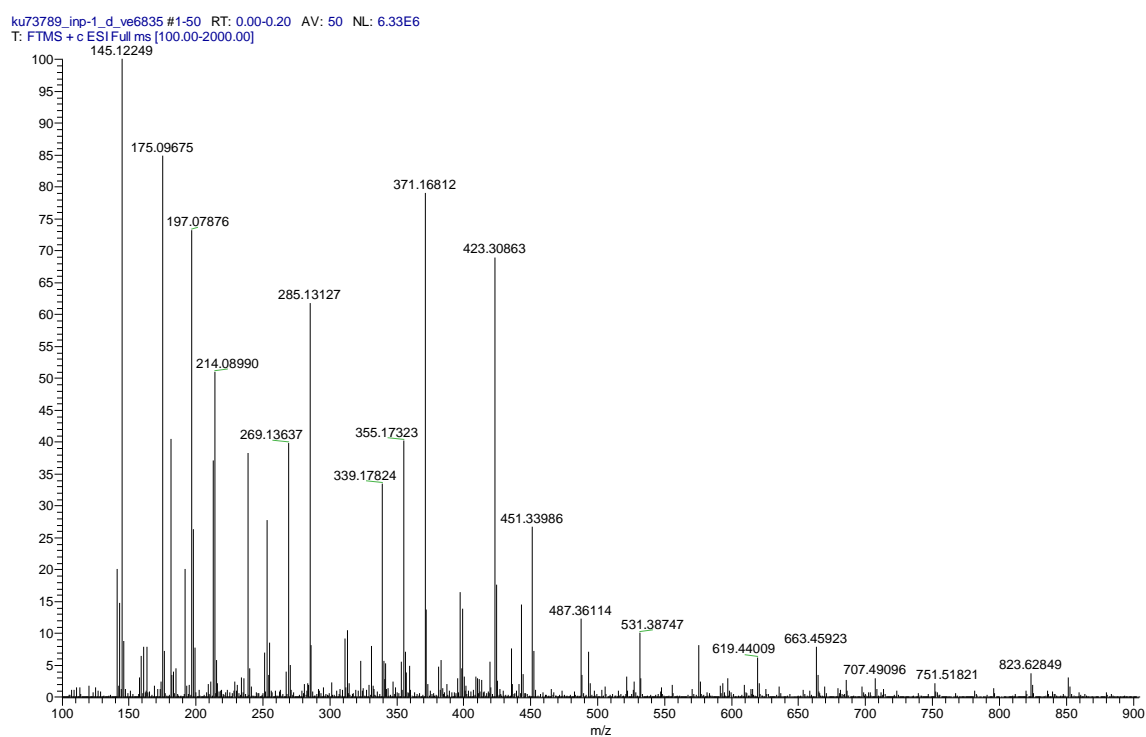

Figure S10. Full HRMS spectrum of compound **1**

ku73789\_inp-1\_d\_ve6836 #1-34 RT: 0.00-0.20 AV: 34 NL: 3.36E4  
T: FTMS + c ESI Full ms2 684.60@cid40.00 [185.00-750.00]

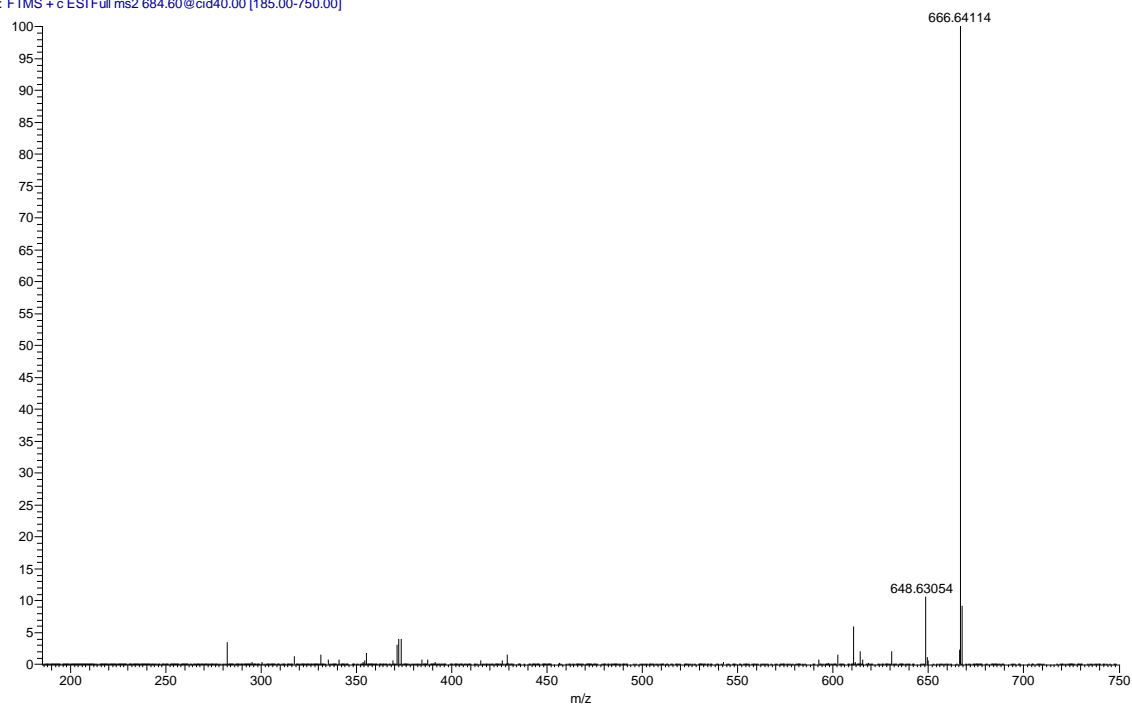

Figure S11. HR-MS/MS spectrum of compound **1**

HRMS: M+H=684.65127 ( $\delta$ =1.8 ppm;  $C_{42}H_{86}O_5N$ ). HR-ESI-MS-MS (CID=40%; rel. int. %): 666(100); 648(11); 300(<1); 282(3).

|           |           |      |     |                    |
|-----------|-----------|------|-----|--------------------|
| 666.64114 | 666.63949 | 2.48 | 1.5 | $C_{42}H_{84}O_4N$ |
| 648.63054 | 648.62892 | 2.49 | 2.5 | $C_{42}H_{82}O_3N$ |
| 300.29071 | 300.28971 | 3.34 | 0.5 | $C_{18}H_{38}O_2N$ |
| 282.28014 | 282.27914 | 3.54 | 1.5 | $C_{18}H_{36}ON$   |

Table S1. HRMS spectral data of compound **1**

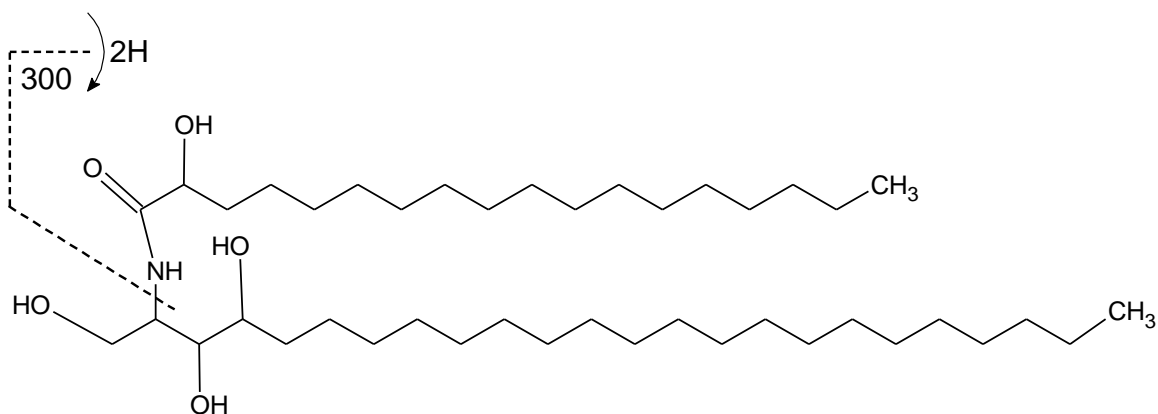

Figure S12. Mass fragmentation of compound **1**

# NMR spectra and spectral data of compound **2**

| No.       | Compound <b>2</b>        |                       |                       |
|-----------|--------------------------|-----------------------|-----------------------|
|           | $\delta$ $^{13}\text{C}$ | $\delta$ $^1\text{H}$ | multiplicity          |
| <b>1</b>  | 127.7                    | -                     | -                     |
| <b>2</b>  | 115.3                    | 7.08                  | d ( $J=1.6$ Hz)       |
| <b>3</b>  | 146.9                    | -                     | -                     |
| <b>4</b>  | 150.0                    | -                     | -                     |
| <b>5</b>  | 116.5                    | 6.80                  | d ( $J=8.2$ Hz)       |
| <b>6</b>  | 123.5                    | 7.00                  | dd ( $J=8.2, 1.6$ Hz) |
| <b>7</b>  | 146.9                    | 7.52                  | d ( $J=16.2$ Hz)      |
| <b>8</b>  | 124.7                    | 6.54                  | d ( $J=16.2$ Hz)      |
| <b>9</b>  | 201.6                    | -                     | -                     |
| <b>10</b> | 27.0                     | 2.33                  | s                     |

Table S2. Complete  $^1\text{H}$  and  $^{13}\text{C}$  NMR resonance assignments for compound **2** (methanol- $d_4$ )

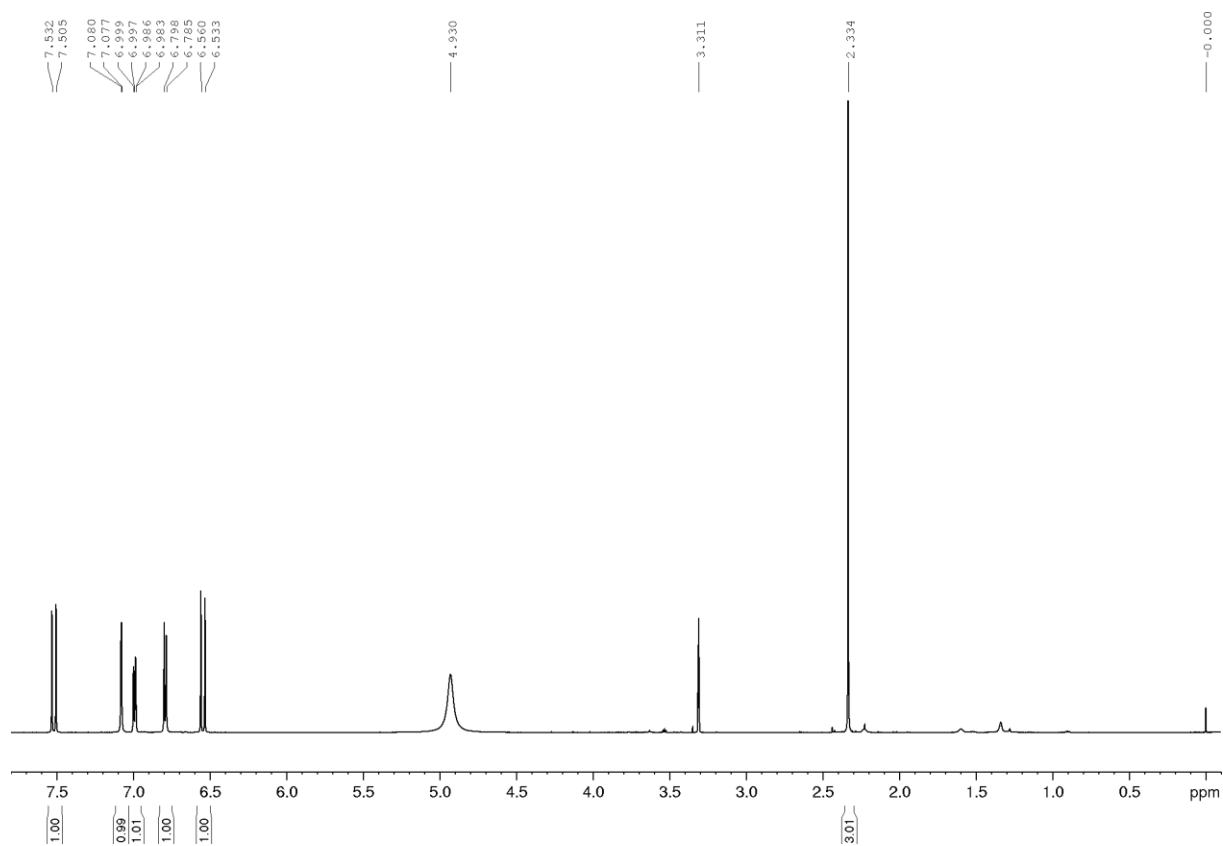

Figure S13.  $^1\text{H}$  NMR spectrum of compound **2** (methanol- $d_4$ )

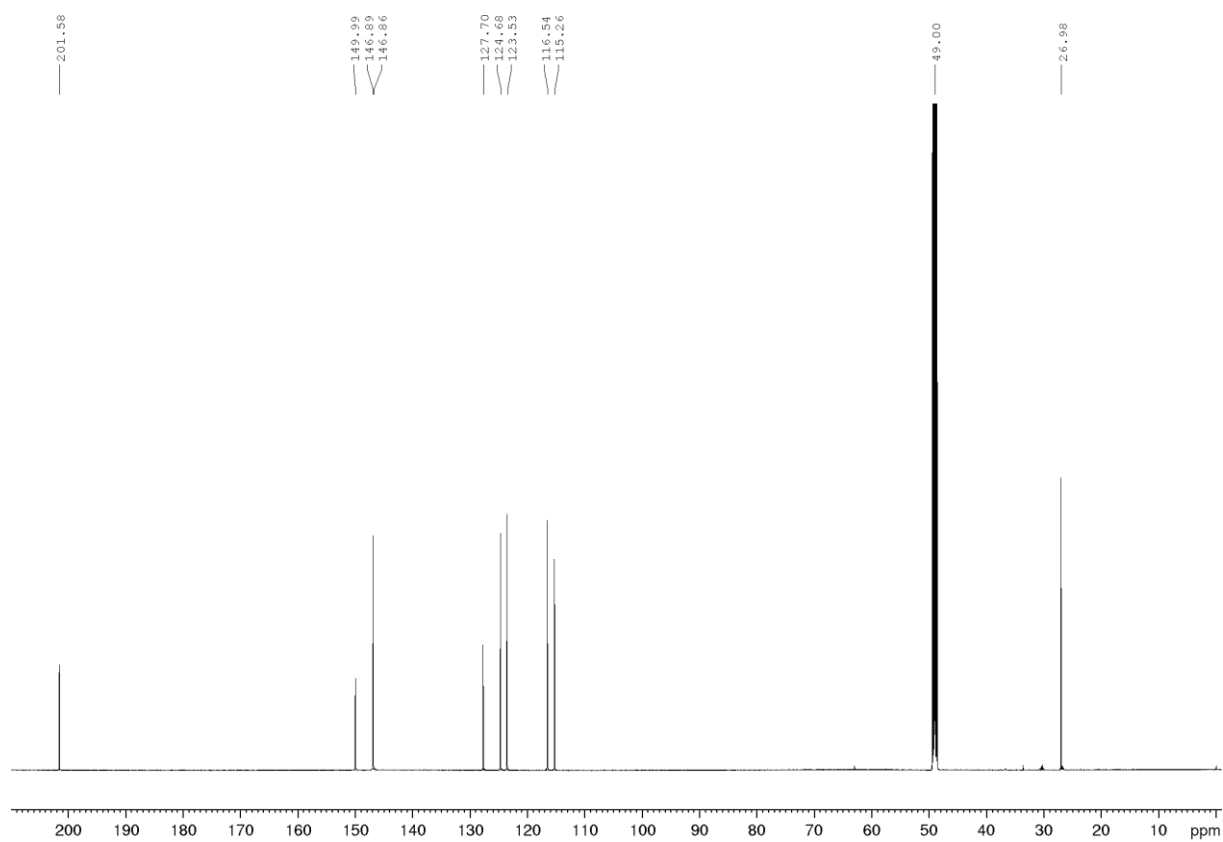

Figure S14.  $^{13}\text{C}$  NMR spectrum of compound **2** (methanol- $d_4$ )

NMR spectra and spectral data of compound **3, 4 and 5**

| No.       | Compound 3            |                    |                      | Compound 4            |                    |                     | Compound 5            |                    |               |
|-----------|-----------------------|--------------------|----------------------|-----------------------|--------------------|---------------------|-----------------------|--------------------|---------------|
|           | $\delta^{13}\text{C}$ | $\delta^1\text{H}$ | multiplicity         | $\delta^{13}\text{C}$ | $\delta^1\text{H}$ | multiplicity        | $\delta^{13}\text{C}$ | $\delta^1\text{H}$ | multiplicity  |
| <b>1</b>  | 35.6                  | 1.73               | m                    | 38.3                  | 1.89               | m                   | 34.6                  | 1.95               | m             |
|           |                       | 1.23               | m                    |                       | 1.31               | m                   |                       | 1.70               | m             |
| <b>2</b>  | 27.8                  | 1.66               | m                    | 32.0                  | 1.88               | m                   | 30.1                  | 1.84               | m             |
|           |                       | 1.59               | m                    |                       | 1.50               | m                   |                       | 1.54               | m             |
| <b>3</b>  | 79.0                  | 3.24               | dd, $J=11.7, 4.4$ Hz | 70.4                  | 3.64               | m                   | 66.5                  | 3.97               | m             |
| <b>4</b>  | 38.9                  | -                  | -                    | 40.8                  | 2.47               | m                   | 36.9                  | 2.11               | m             |
|           |                       |                    |                      |                       | 2.29               | m                   |                       | 1.91               | m             |
| <b>5</b>  | 50.4                  | 1.05               | m                    | 46.2                  | 1.97               | m                   | 82.1                  | -                  | -             |
| <b>6</b>  | 18.2                  | 1.68               | m                    | 119.6                 | 5.57               | dd, $J=5.8, 2.5$ Hz | 135.4                 | 6.24               | d, $J=8.5$ Hz |
|           |                       | 1.51               | m                    |                       |                    |                     |                       |                    |               |
| <b>7</b>  | 26.5                  | 2.04               | m                    | 116.3                 | 5.39               | m                   | 130.7                 | 6.51               | d, $J=8.5$ Hz |
| <b>8</b>  | 134.4                 | -                  | -                    | 141.4                 | -                  | -                   | 79.4                  | -                  | -             |
| <b>9</b>  | 134.4                 | -                  | -                    | 139.8                 | -                  | -                   | 51.0                  | 1.50               | m             |
| <b>10</b> | 37.0                  | -                  | -                    | 37.0                  | -                  | -                   | 36.9                  | -                  | -             |
| <b>11</b> | 21.0                  | 2.00               | m                    | 21.1                  | 1.72               | m                   | 23.4                  | 1.51               | m             |
|           |                       |                    |                      |                       | 1.59               | m                   |                       | 1.23               | m             |
| <b>12</b> | 30.9                  | 1.69               | m                    | 39.0                  | 2.06               | m                   | 39.3                  | 1.95               | m             |
|           |                       |                    |                      |                       | 1.26               | m                   |                       | 1.23               | m             |
| <b>13</b> | 44.4                  | -                  | -                    | 42.8                  | -                  | -                   | 44.5                  | -                  | -             |
| <b>14</b> | 49.8                  | -                  | -                    | 54.5                  | 1.89               | m                   | 51.6                  | 1.22               | m             |
| <b>15</b> | 30.8                  | 1.59               | m                    | 28.3                  | 1.76               | m                   | 20.6                  | 1.59               | m             |

|    |       |      |             |       |      |                    |       |      |                    |
|----|-------|------|-------------|-------|------|--------------------|-------|------|--------------------|
|    |       | 1.17 | m           |       |      |                    |       | 1.41 | m                  |
| 16 | 28.2  | 1.92 | m           | 23.0  | 1.66 | m                  | 28.6  | 1.75 | m                  |
|    |       | 1.32 | m           |       | 1.36 | m                  |       | 1.35 | m                  |
|    |       |      |             |       |      |                    |       |      |                    |
| 17 | 50.4  | 1.48 | m           | 55.7  | 1.26 | m                  | 56.1  | 1.22 | m                  |
| 18 | 15.7  | 0.69 | s           | 12.0  | 0.63 | s                  | 12.8  | 0.82 | s                  |
| 19 | 19.1  | 0.98 | s           | 16.3  | 0.95 | s                  | 18.2  | 0.88 | s                  |
| 20 | 36.2  | 1.38 |             | 40.4  | 2.04 | m                  | 39.7  | 2.02 | m                  |
| 21 | 18.6  | 0.91 | d, J=6.4 Hz | 21.1  | 1.04 | d, J=6.7 Hz        | 20.9  | 1.00 | d, J=6.6 Hz        |
| 22 | 36.3  | 1.43 | m           | 135.6 | 5.18 | dd, J=15.3, 7.3 Hz | 135.2 | 5.14 | dd, J=15.5, 8.4 Hz |
|    |       | 1.04 | m           |       |      |                    |       |      |                    |
|    |       |      |             |       |      |                    |       |      |                    |
| 23 | 24.9  | 2.03 | m           | 131.9 | 5.21 | dd, J=15.3, 7.3 Hz | 132.3 | 5.22 | dd, J=15.5, 7.7 Hz |
|    |       | 1.86 | m           |       |      |                    |       |      |                    |
|    |       |      |             |       |      |                    |       |      |                    |
| 24 | 125.2 | 5.10 | m           | 42.8  | 1.85 | m                  | 42.7  | 1.85 | m                  |
| 25 | 130.9 | -    | -           | 33.1  | 1.47 | m                  | 33.0  | 1.47 | m                  |
| 26 | 17.6  | 1.60 | s           | 19.9  | 0.84 | d, J=6.8 Hz        | 19.6  | 0.82 | d, J=6.8 Hz        |
| 27 | 25.7  | 1.68 | s           | 19.6  | 0.82 | d, J=6.8 Hz        | 19.9  | 0.83 | d, J=6.8 Hz        |
| 28 | 27.9  | 1.00 | s           | 17.6  | 0.92 | d, J=6.8 Hz        | 17.5  | 0.91 | d, J=6.8 Hz        |
| 29 | 15.4  | 0.81 | s           |       |      |                    |       |      |                    |
| 30 | 24.2  | 0.87 | s           |       |      |                    |       |      |                    |

Table S3. Complete <sup>1</sup>H and <sup>13</sup>C NMR resonance assignments for compounds **3**, **4** and **5** (CDCl<sub>3</sub>)

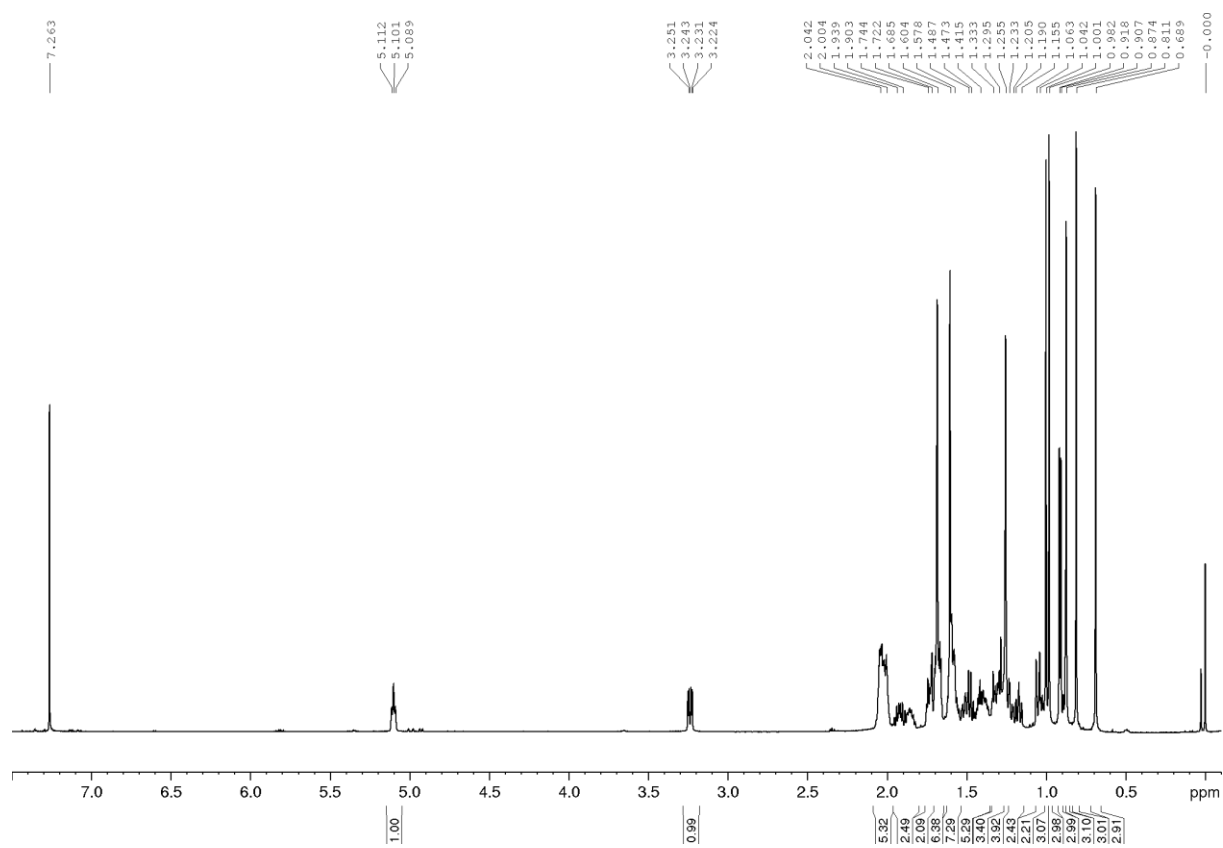

Figure S15.  $^1\text{H}$  NMR spectrum of compound **3** ( $\text{CDCl}_3$ )

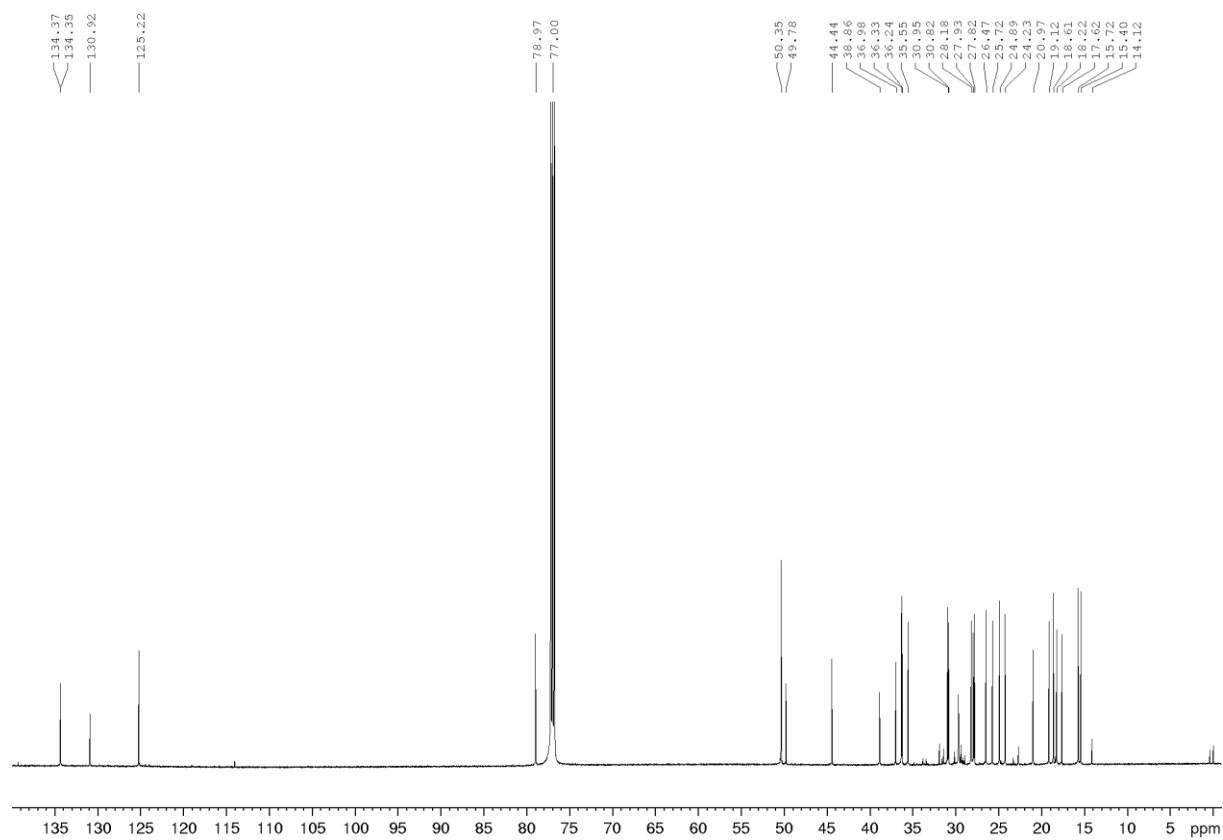

Figure S16.  $^{13}\text{C}$  NMR spectrum of compound **3** ( $\text{CDCl}_3$ )

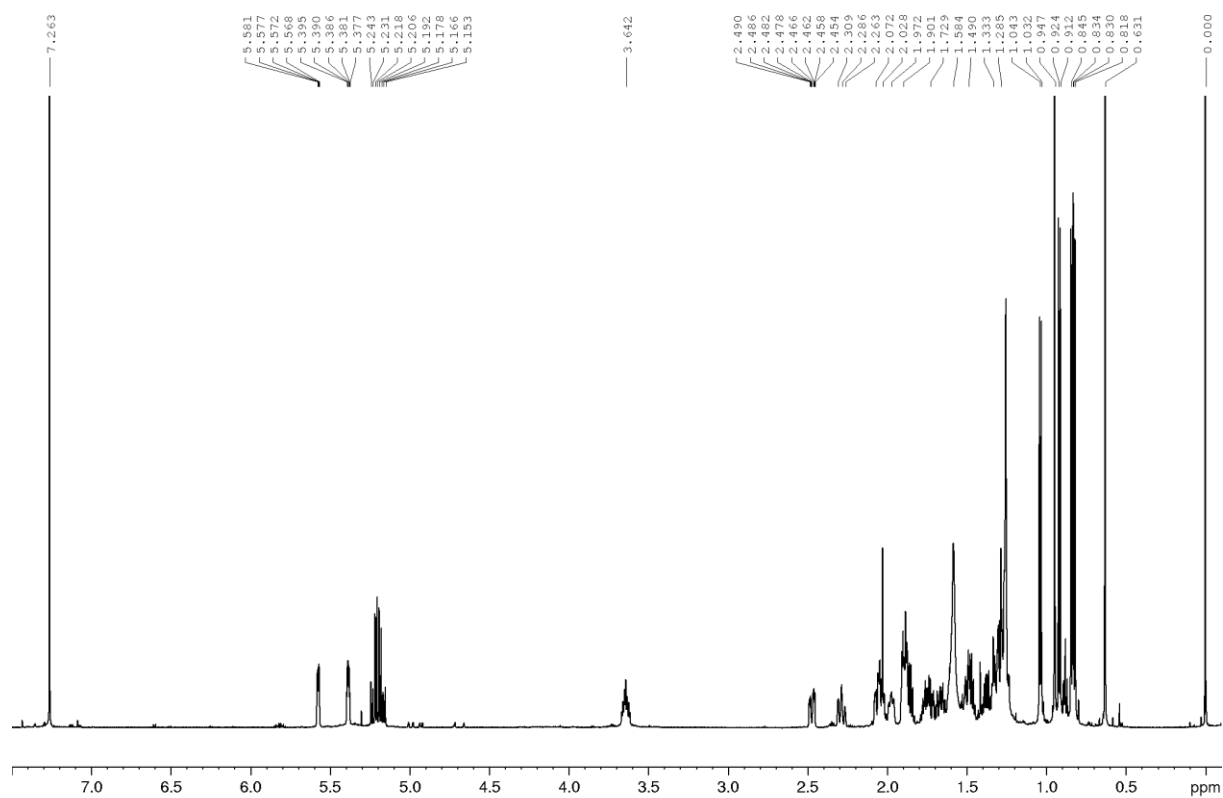

Figure S17.  $^1\text{H}$  NMR spectrum of compound **4** ( $\text{CDCl}_3$ )

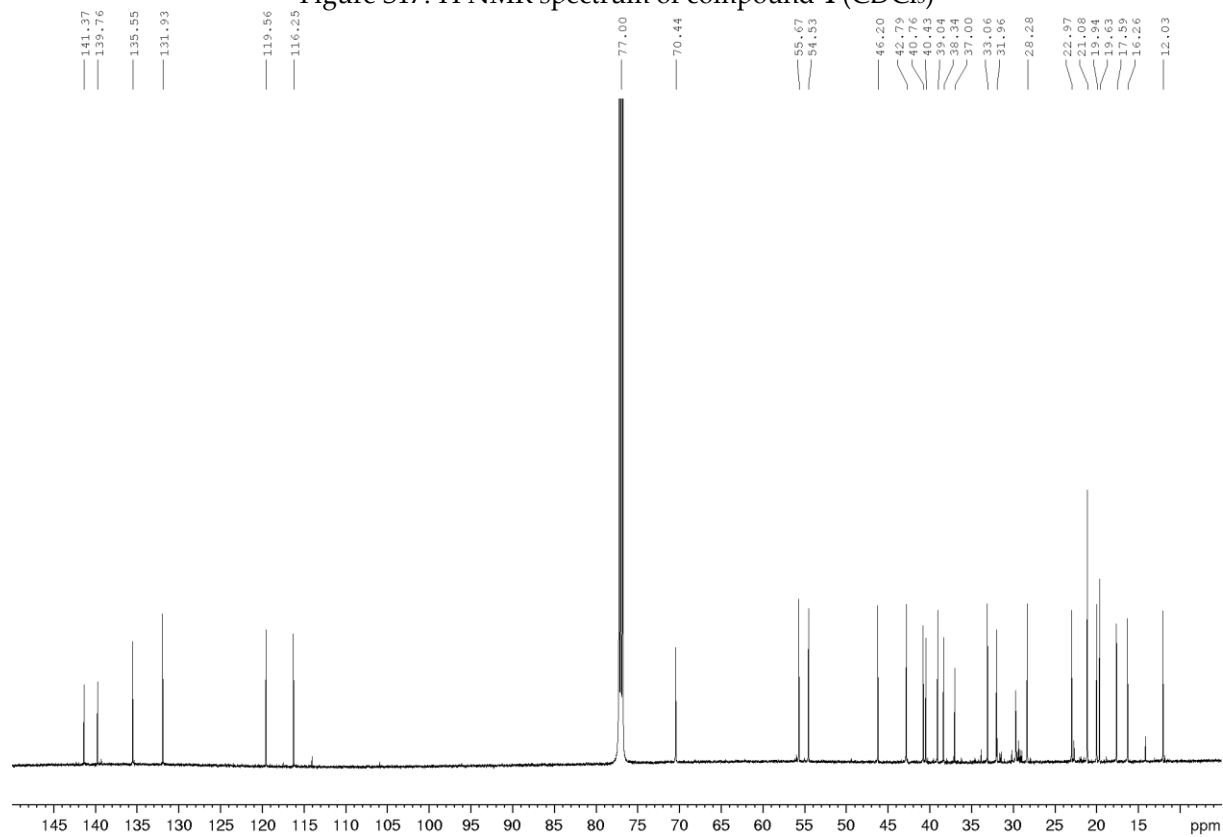

Figure S18.  $^{13}\text{C}$  NMR spectrum of compound **4** ( $\text{CDCl}_3$ )

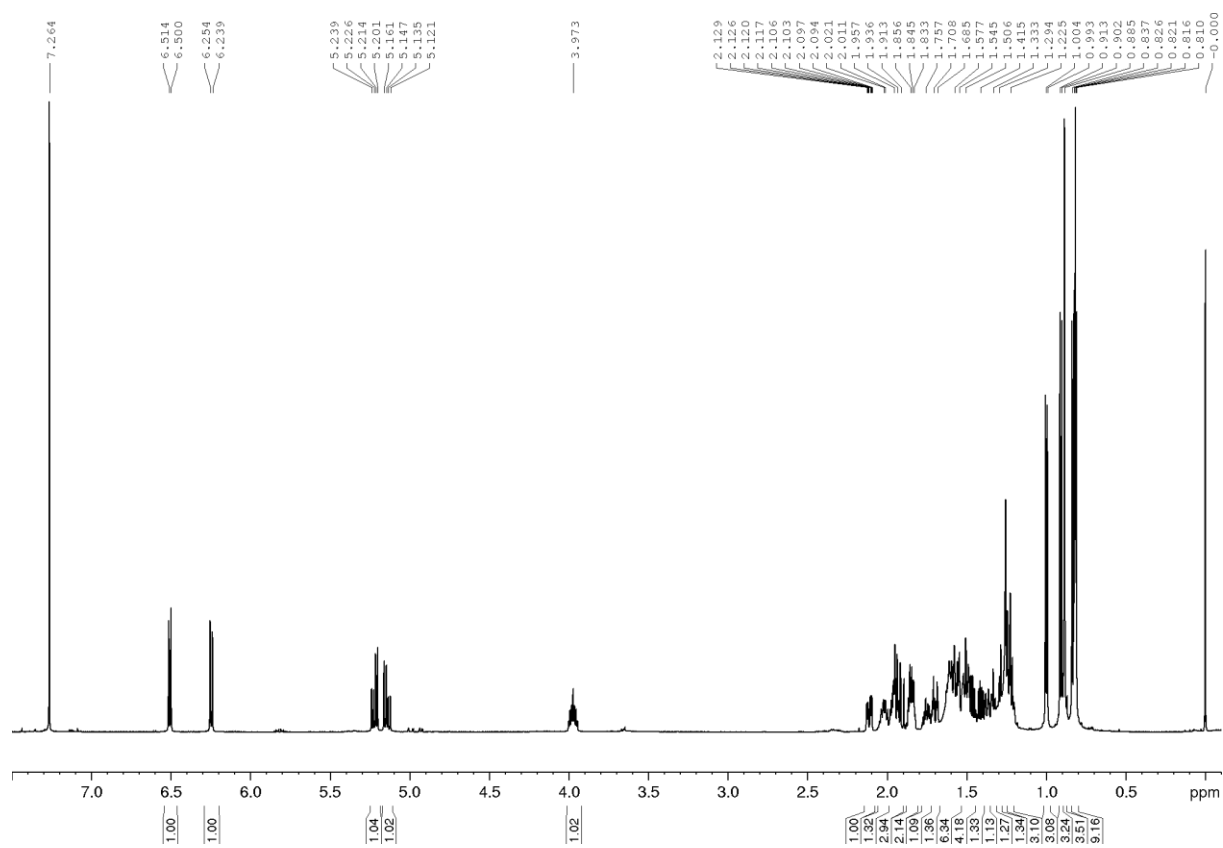

Figure S19.  $^1\text{H}$  NMR spectrum of compound **5** ( $\text{CDCl}_3$ )

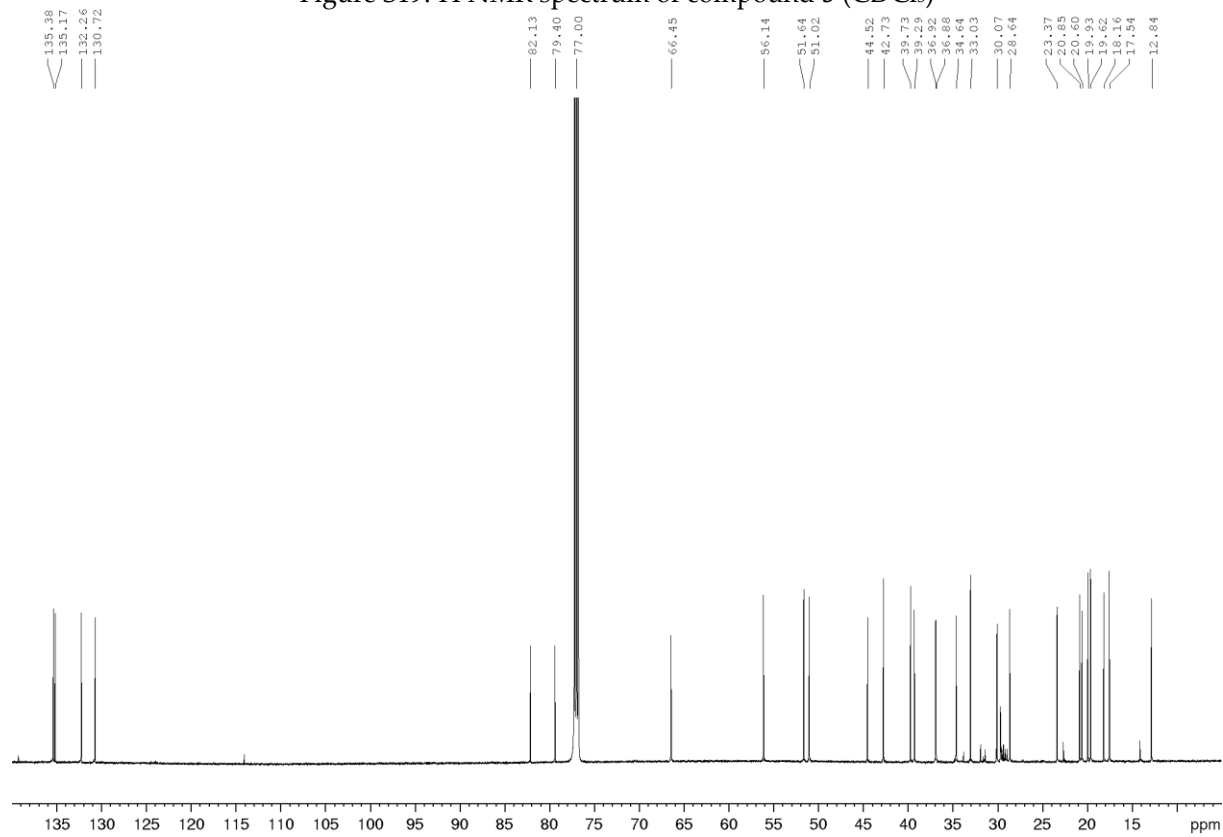

Figure S20.  $^{13}\text{C}$  NMR spectrum of compound **5** ( $\text{CDCl}_3$ )
